# Supplementary material for: Knockdown of a β-Adrenergic-Like Octopamine Receptor Affects Locomotion and Reproduction of Tribolium castaneum
Source: MDPI journal article supplement (doi:10.3390/ijms22147252), 2021-07-06
Supplement: s1 [file s1]

**Table S1.** sequence of primers.

| Application of Primers    | Primer Names         | Sequence (5' - 3')                             | Product Size(bp) |
|---------------------------|----------------------|------------------------------------------------|------------------|
| ORF cloning               | TcOct $\beta$ 2R-F1  | CTCTT-<br>GACTTTCTTCGACAAG                     | 1326bp           |
|                           | TcOct $\beta$ 2R-R1  | GCAGACTAGAACTAG-<br>TGGTCG                     |                  |
|                           | TcOct $\beta$ 2R-F2  | GCGATGGACAACCTTAACAT<br>AC                     | 1257bp           |
|                           | TcOct $\beta$ 2R-R2  | CTGCTAGTTAGGTC-<br>TACTCAGAGAC                 |                  |
| qRT-PCR                   | qTcOct $\beta$ 2R-F  | GAGCG-<br>GAATCTCAACAAAATG                     | 279bp            |
|                           | qTcOct $\beta$ 2R-R  | GCGGCACAAAC-<br>TACAAAAAAC                     |                  |
| qRT-PCR (reference genes) | qTcRPS3-F            | CGCATTTCATGGTTGATAACG                          | 150bp            |
|                           | qTcRPS3-R            | GGGCACCAAGTTAGTCTGGA                           |                  |
| dsRNA synthesis           | dsTcOct $\beta$ 2R-F | taatacgactcactataggCGTGCAC-<br>GATCATGATCTAC   | 439bp            |
|                           | dsTcOct $\beta$ 2R-R | taatacgactcac-<br>tataggGCTTCCCTGAAGTCCTT<br>G |                  |

The lowercase letters represent the T7 promoter sequences for efficient *in vitro* transcription in dsRNA synthesis.

**Table S2.** Overview information of the 39 sequences in phylogenetic tree.

| Abbreviations       | Species                       | GenBank<br>Accession Number |
|---------------------|-------------------------------|-----------------------------|
| TcOct $\beta$ 1R    | <i>Tribolium castaneum</i>    | NP_001280514.1              |
| TcOct $\beta$ 2R    | <i>Tribolium castaneum</i>    | NP_001280501.1              |
| TcOct $\beta$ 3R    | <i>Tribolium castaneum</i>    | NP_001280505.1              |
| TcTyrR              | <i>Tribolium castaneum</i>    | NP_001164312.1              |
| DmOamb              | <i>Drosophila melanogaste</i> | NP_732542.1                 |
| DmOct $\alpha$ 2SR* | <i>Drosophila melanogaste</i> | NP_001262714.1              |
| DmOct $\alpha$ 2LR* | <i>Drosophila melanogaste</i> | NP_650754.2                 |
| DmOct $\alpha$ 2LR  | <i>Drosophila melanogaste</i> | NP_001262715.1              |
| DmOct $\beta$ 1R    | <i>Drosophila melanogaste</i> | NP_001262843.1              |
| DmOct $\beta$ 2R    | <i>Drosophila melanogaste</i> | NP_001303505.1              |
| DmOct $\beta$ 3R    | <i>Drosophila melanogaste</i> | NP_001034046.3              |
| DmTyrR1             | <i>Drosophila melanogaste</i> | NP_524419.2                 |
| DmTyrR2             | <i>Drosophila melanogaste</i> | NP_001287382.1              |
| DmTyrR3             | <i>Drosophila melanogaste</i> | NP_650651.1                 |
| BmOct $\alpha$ 1R   | <i>Bombyx mori</i>            | NP_001091748.1              |
| BmOct $\beta$ 2R    | <i>Bombyx mori</i>            | NP_001171666.1              |
| BmOct $\beta$ 1R    | <i>Bombyx mori</i>            | XP_037876565.1              |
| BmTyrR1             | <i>Bombyx mori</i>            | NP_001037504.1              |
| BmTyrR2             | <i>Bombyx mori</i>            | NP_001164649.1              |
| AmOct $\alpha$ 1R   | <i>Apis mellifera</i>         | NP_001011565.1              |
| AmOct $\beta$ 1R    | <i>Apis mellifera</i>         | XP_397139.3                 |
| AmOct $\beta$ 2R    | <i>Apis mellifera</i>         | XP_006558130.1              |
| AmOct $\beta$ 3R-1  | <i>Apis mellifera</i>         | XP_006557728.1              |
| AmOct $\beta$ 3R-2  | <i>Apis mellifera</i>         | XP_006557730.1              |
| AmTyrR1             | <i>Apis mellifera</i>         | NP_001011594.1              |
| AmTyrR2             | <i>Apis mellifera</i>         | NP_001032395.1              |
| CsOct $\alpha$ 2SR  | <i>Chilo suppressalis</i>     | AIC75371.1                  |
| CsOct $\alpha$ 2LR  | <i>Chilo suppressalis</i>     | AIC75370.1                  |
| CsOct $\beta$ 1R    | <i>Chilo suppressalis</i>     | AGV79326.1                  |
| CsOct $\beta$ 2R    | <i>Chilo suppressalis</i>     | AEO89318.1                  |

---

|                                   |                               |                |
|-----------------------------------|-------------------------------|----------------|
| <i>CsTyrR1</i>                    | <i>Chilo suppressalis</i>     | AFG26689.1     |
| <i>CsTyrR2</i>                    | <i>Chilo suppressalis</i>     | ADK91078.1     |
| <i>CsOct<math>\alpha</math>1R</i> | <i>Chilo suppressalis</i>     | AEQ33589.1     |
| <i>NIOct<math>\alpha</math>R</i>  | <i>Nilaparvata lugens</i>     | ATY68965.1     |
| <i>NIOct<math>\beta</math>2R</i>  | <i>Nilaparvata lugens</i>     | ASA47149.1     |
| <i>NIOct<math>\beta</math>3R</i>  | <i>Nilaparvata lugens</i>     | QBC74627.      |
| <i>PaOct<math>\alpha</math>1R</i> | <i>Periplaneta americana</i>  | AAP93817.1     |
| <i>PaTyrR1</i>                    | <i>Periplaneta americana</i>  | SNT95699.1     |
| <i>DmPDFR</i>                     | <i>Drosophila melanogaste</i> | NP_001284827.1 |

---
